# Supplementary material for: Ectosomes and exosomes are distinct proteomic entities that modulate spontaneous activity in neuronal cells
Source: bioRxiv or medRxiv preprint supplement (doi:10.1101/2021.06.24.449731), 2021-06-25
Supplement: Supplementary file [file media-1.pdf]

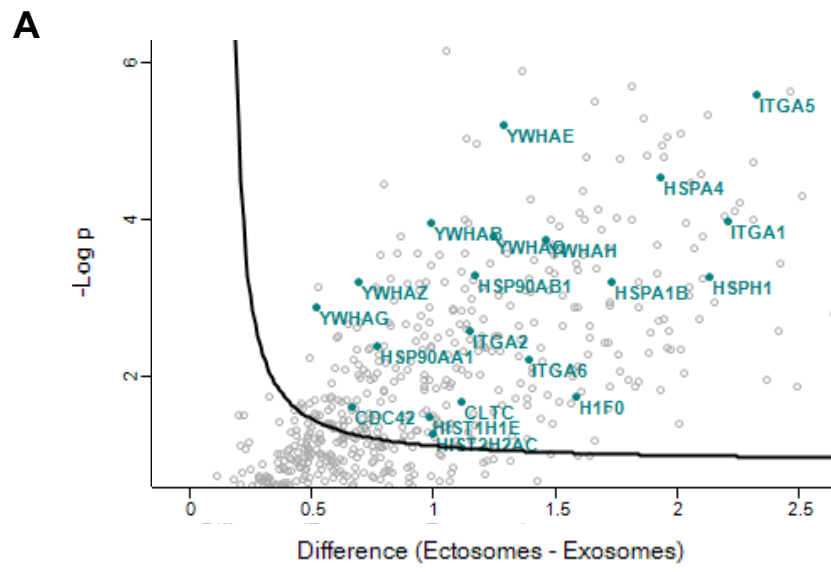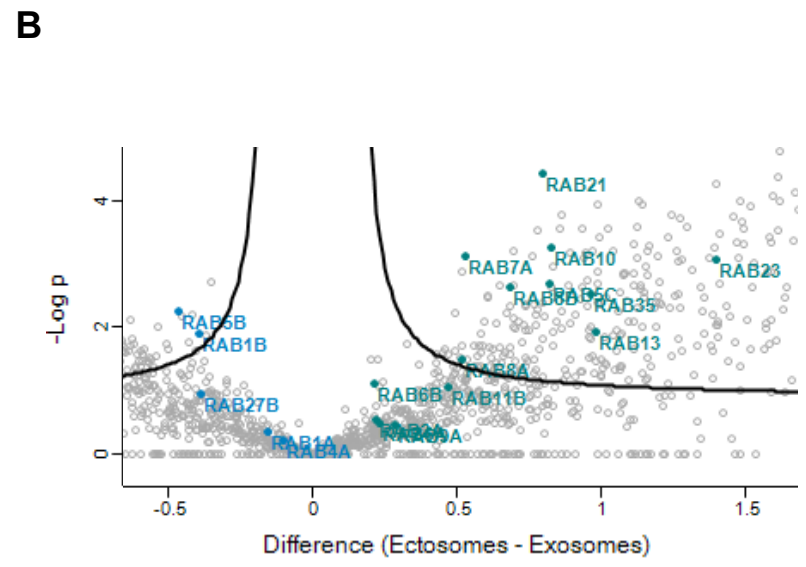

Supplementary Figure 1. Protein hits enriched in ectosomes and exosomes. Volcano plots of quantitative differences in proteins in EVs fractions.

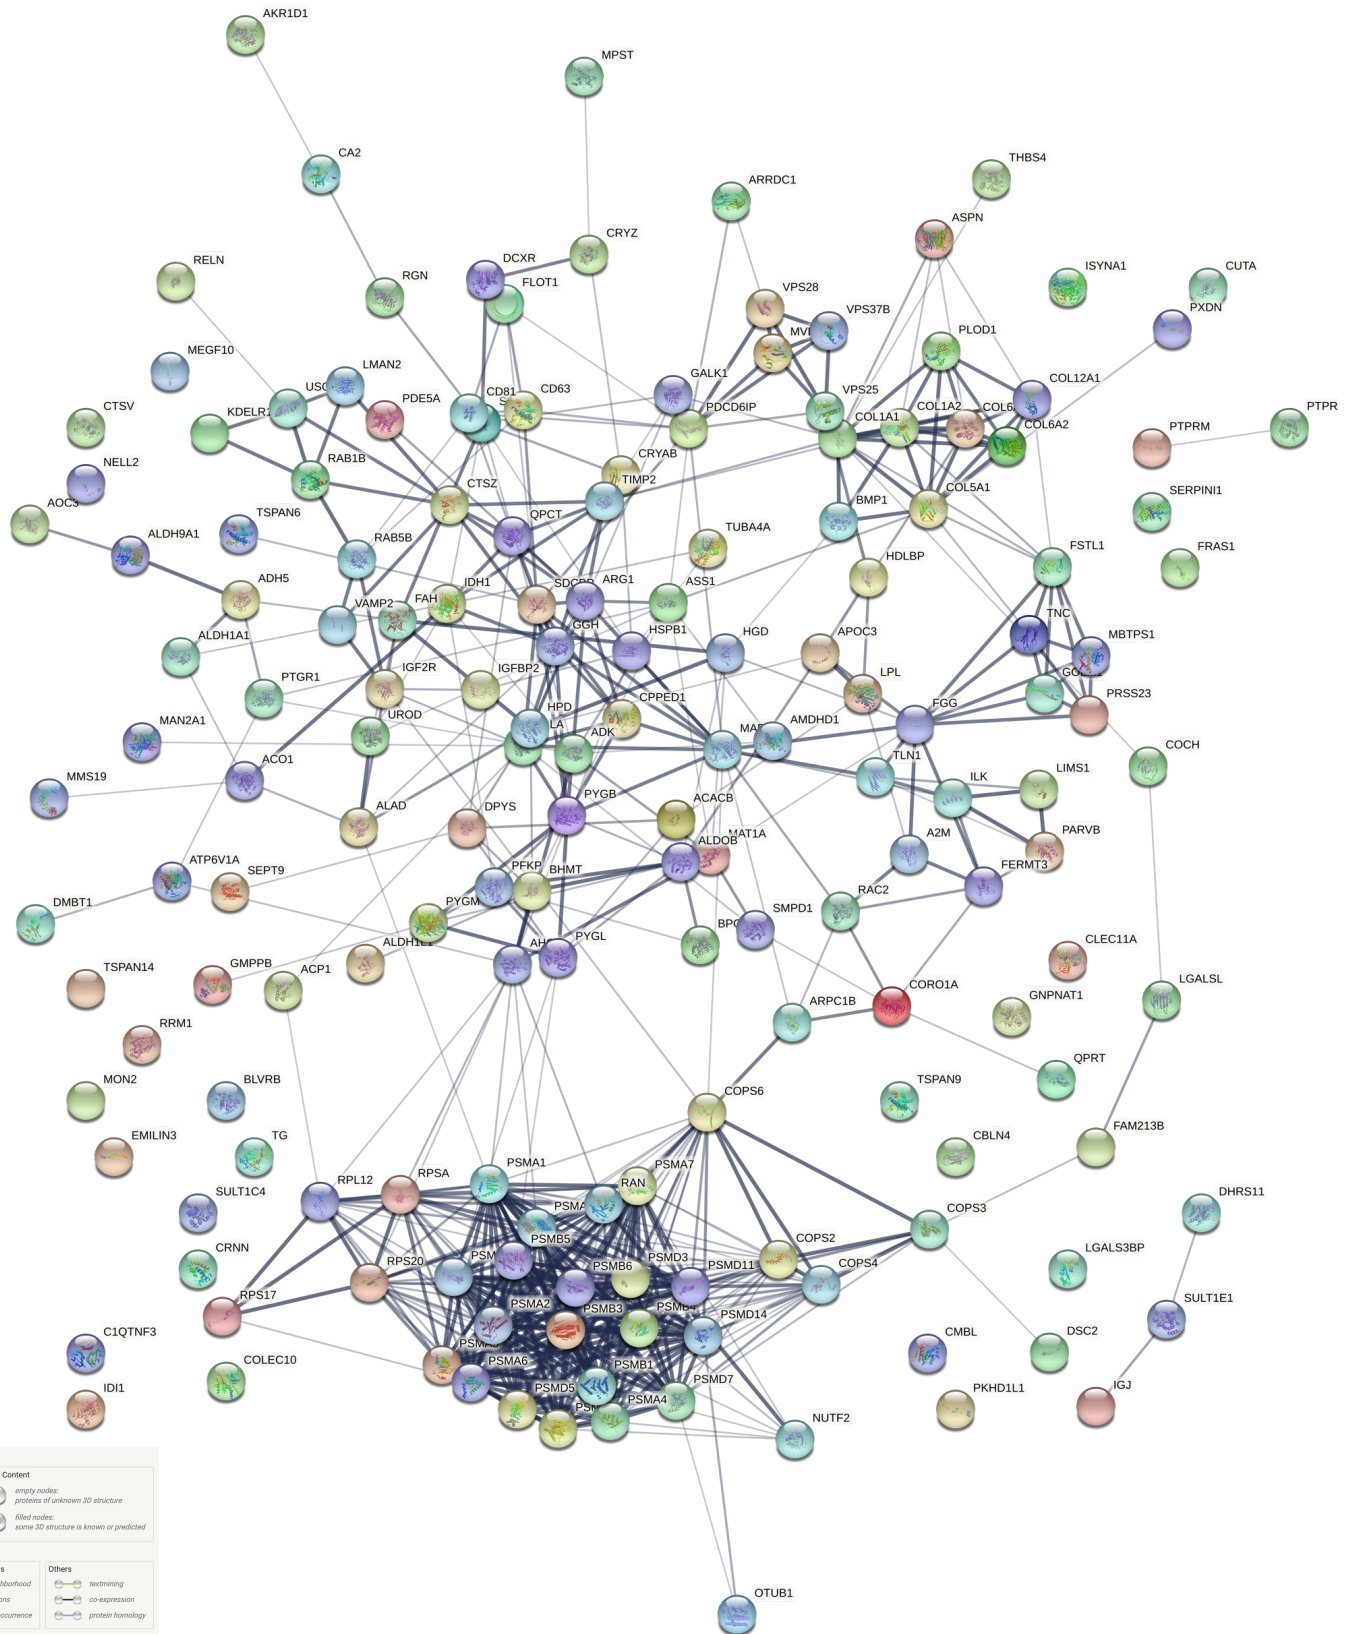

**Supplementary Figure 2. Functional protein association networks were plotted by using the STRING database.**

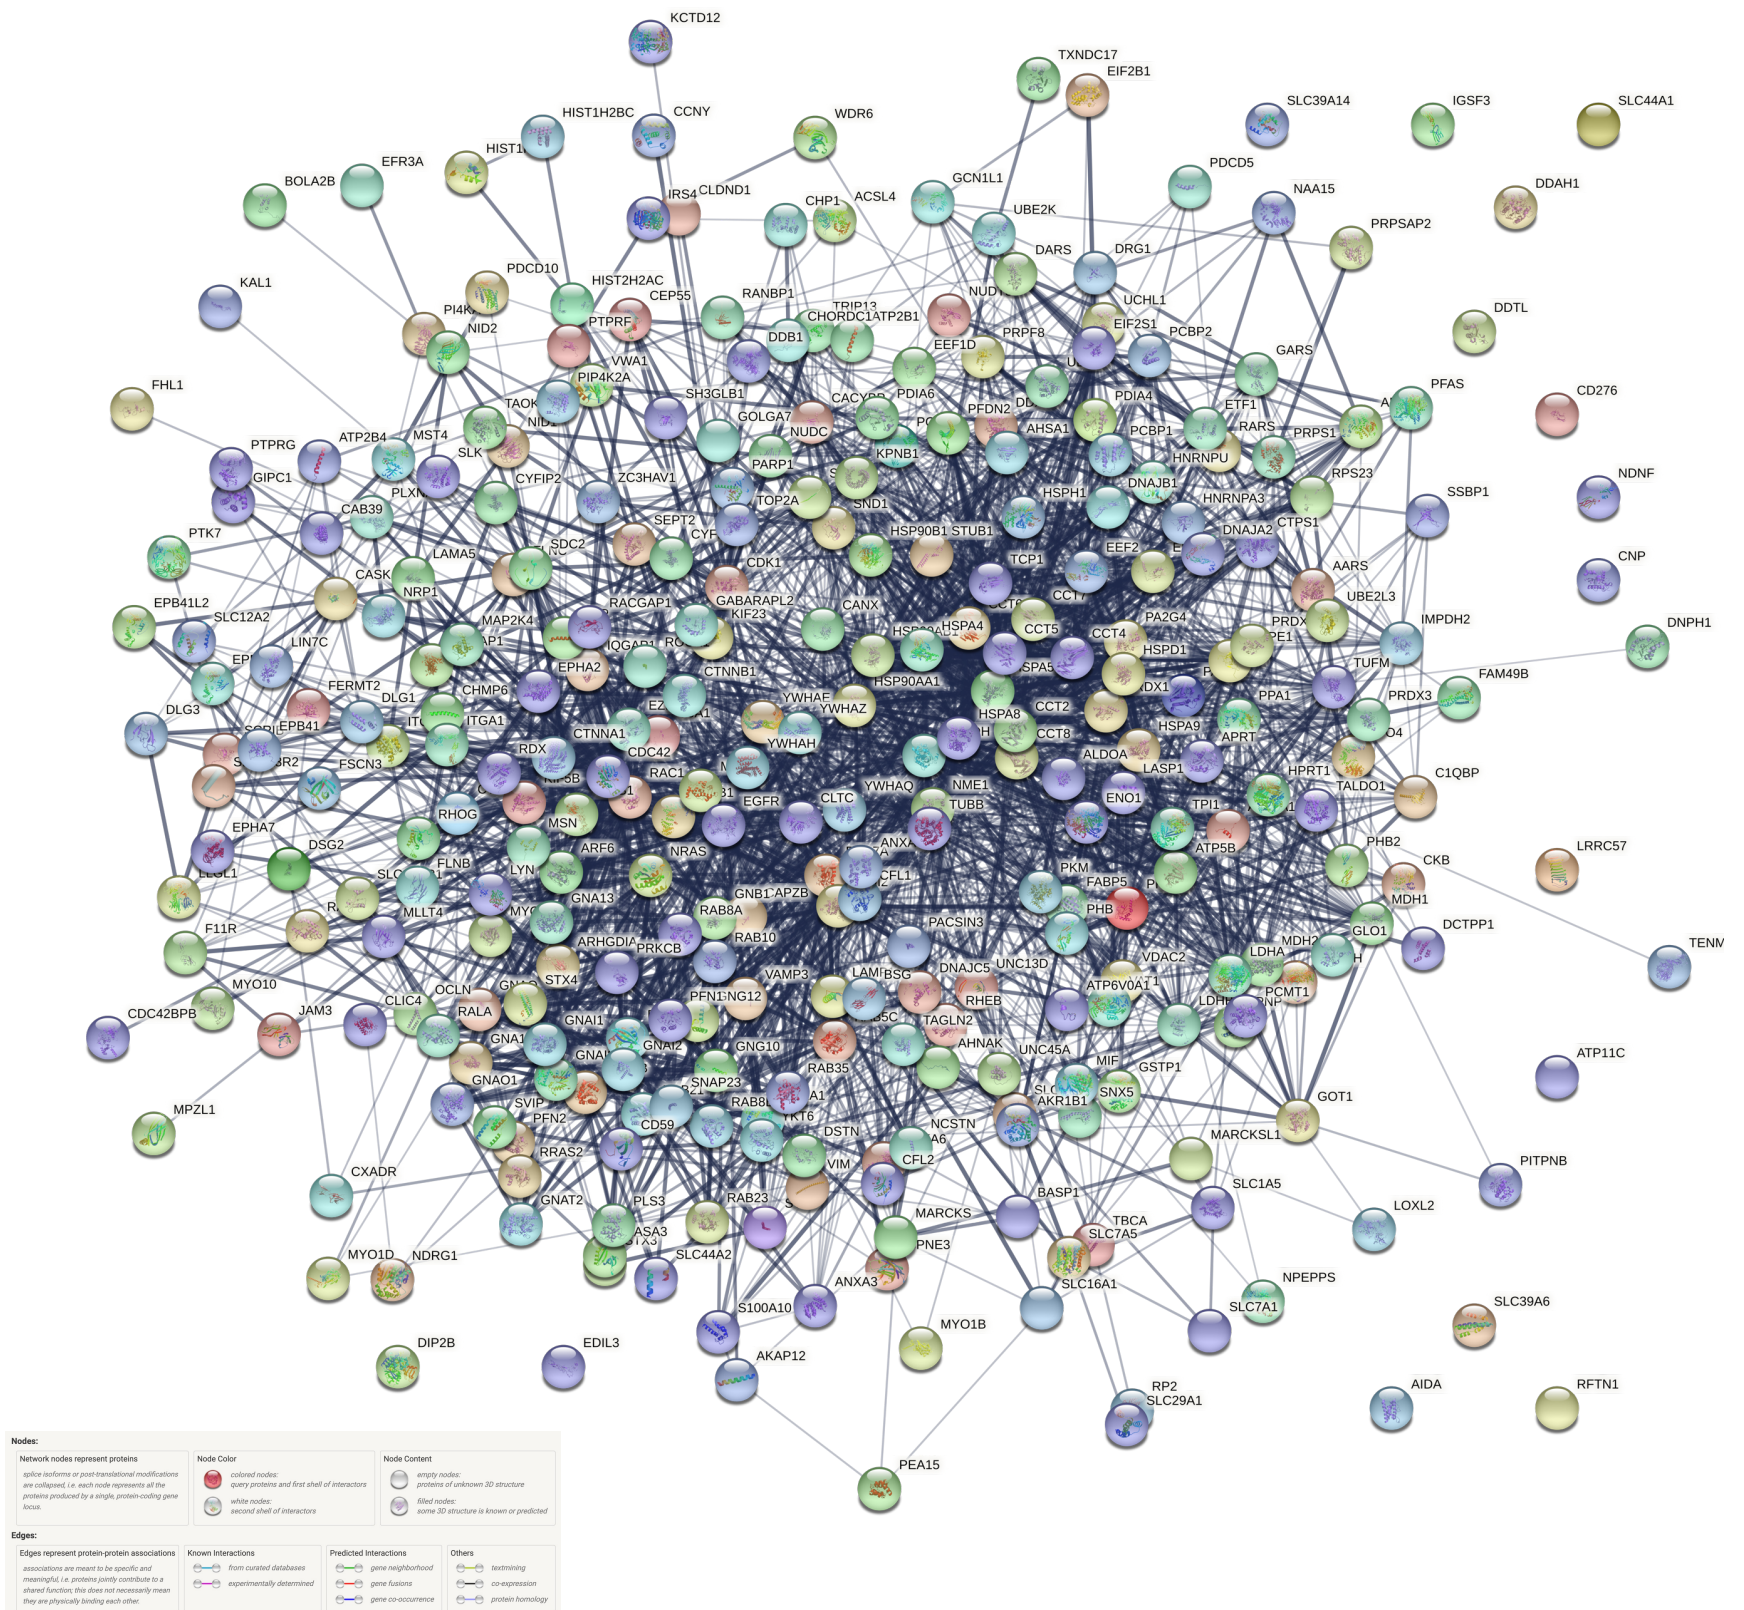

**Supplementary Figure 3. Functional protein association networks were plotted by using the STRING database.**

**A**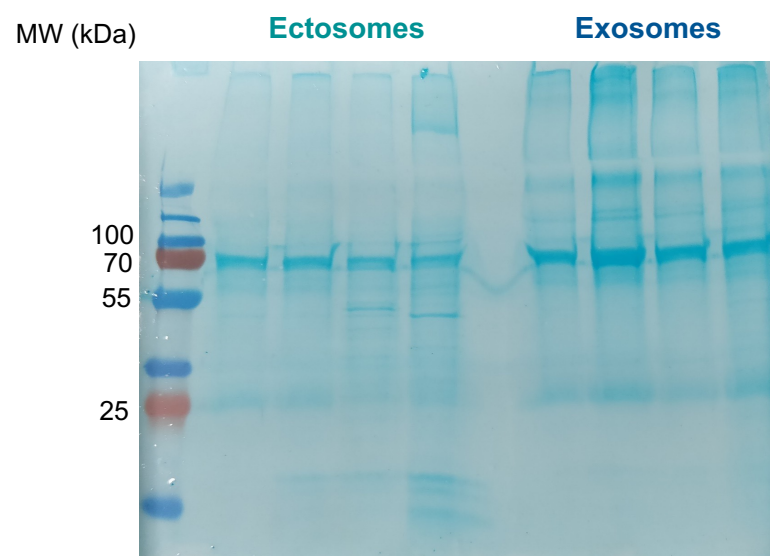**B**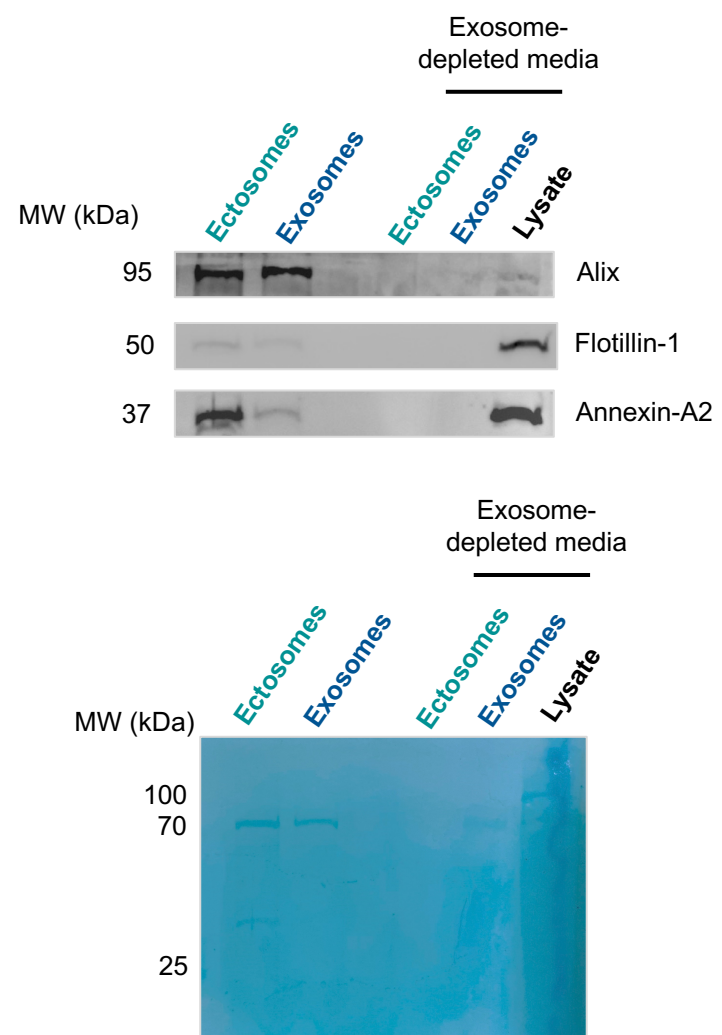

**Supplementary Figure 4. Conditioned media used for the experiments does not contain residual EVs.**

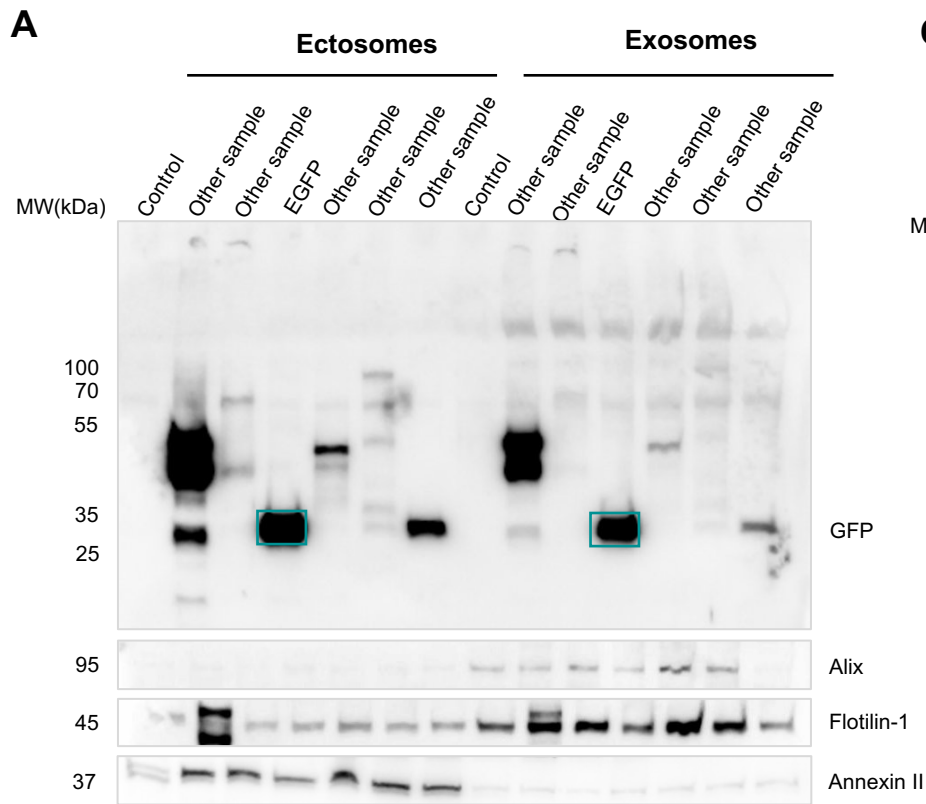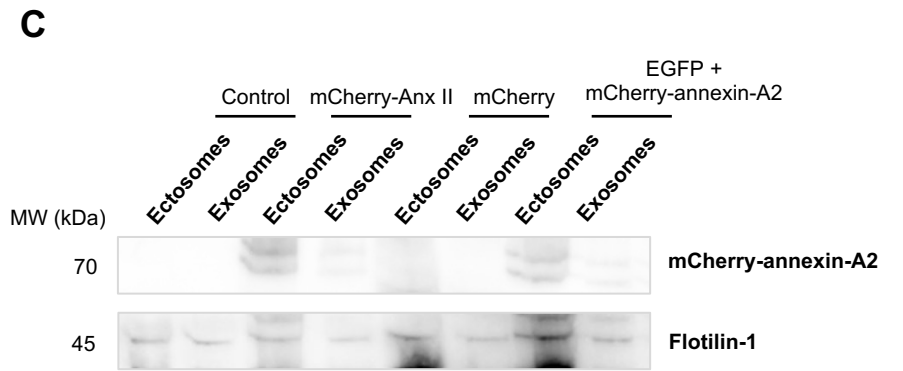

Supplementary Figure 5. Characterisation of EGFP and annexin-A2 levels in EVs.

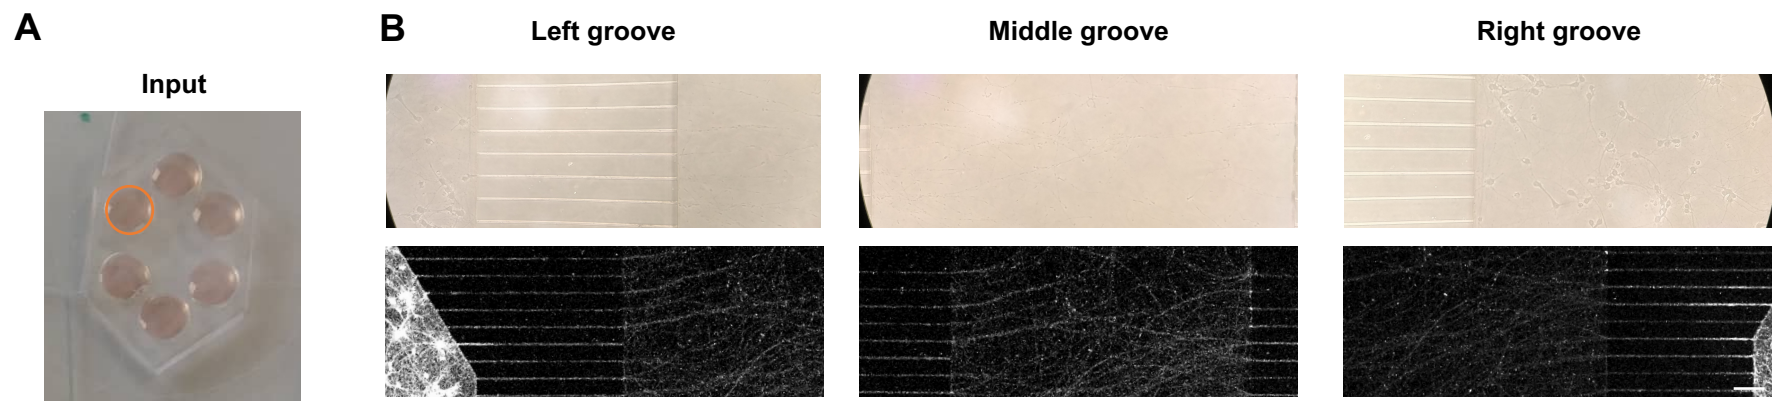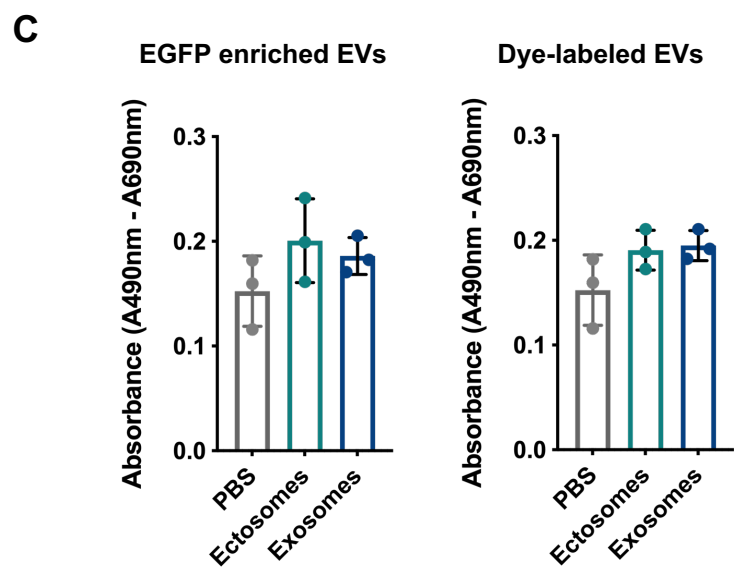

Supplementary Figure 6. Cellular uptake of EVs by primary cortical neurons.

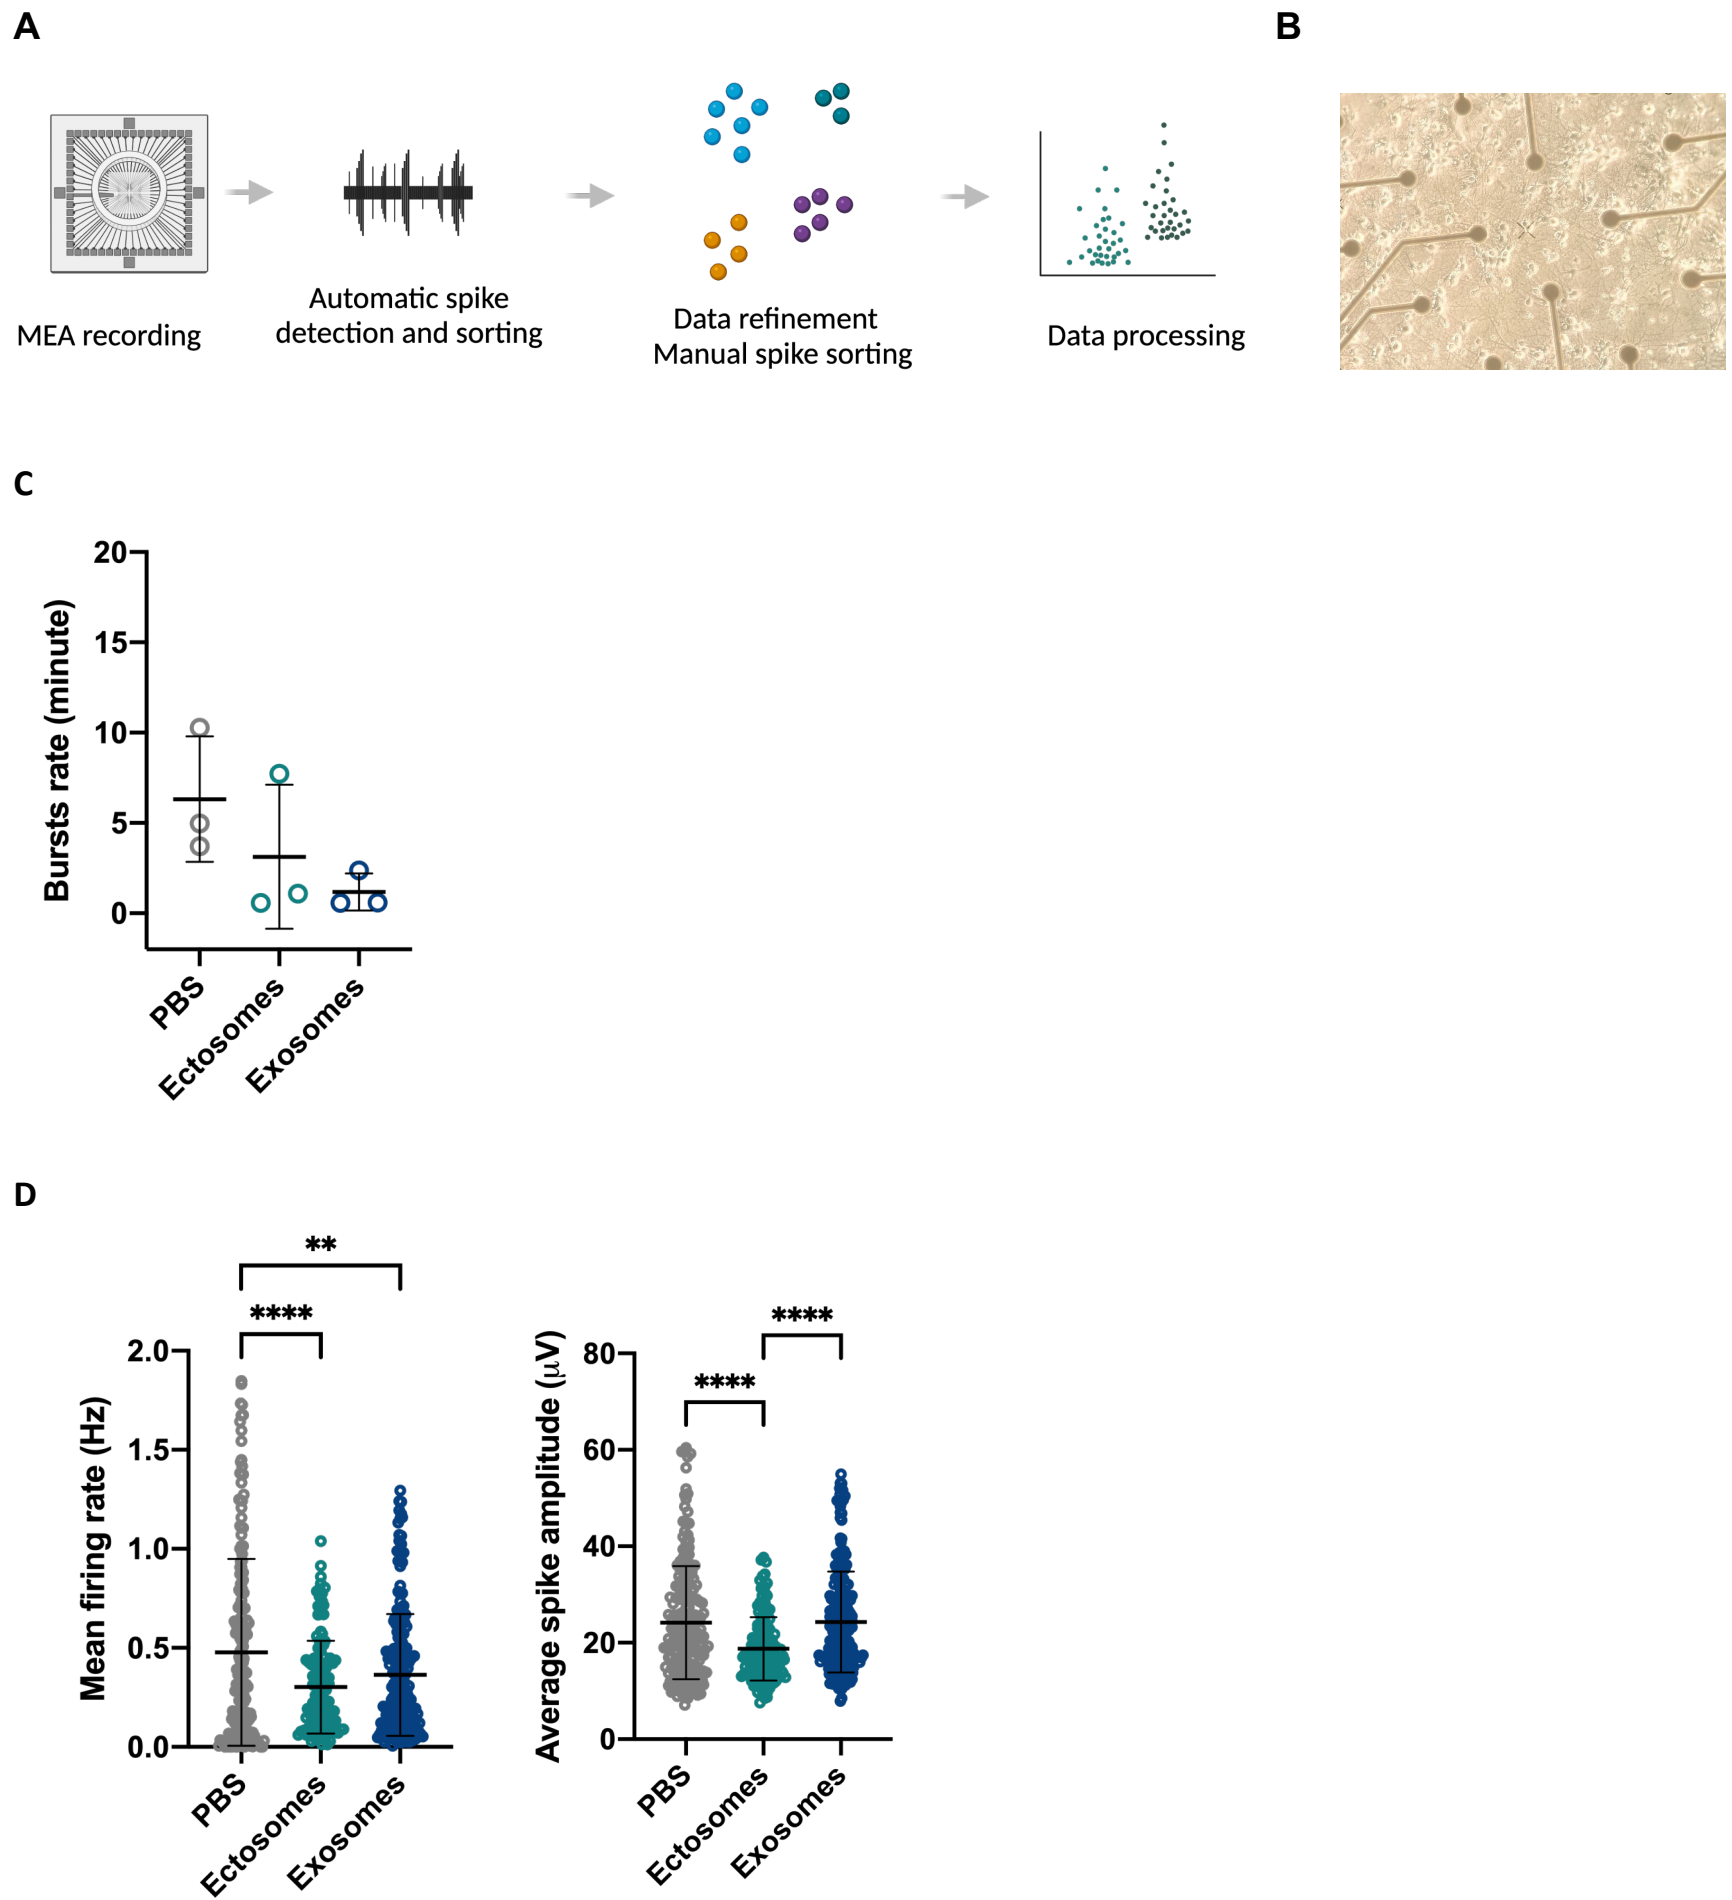

Supplementary Figure 7. EVs modulate synaptic function in primary cortical neurons.
