# Supplementary material for: Ectosomes and exosomes are distinct proteomic entities that modulate spontaneous activity in neuronal cells
Source: bioRxiv or medRxiv preprint supplement (doi:10.1101/2021.06.24.449731), 2021-06-25
Supplement: Supplementary file [file media-2.pdf]

**Supplementary Table 1.** List of significantly altered proteins identified in exosomes. Common proteins (11) in the list of Top 100 proteins often identified in EVs are highlighted in bold (see Supplementary Table 3).

| <b>Protein names</b>                                   | <b>Gene names</b>      | <b>-log<sub>10</sub>(p-value)</b> |
|--------------------------------------------------------|------------------------|-----------------------------------|
| <b>Alix</b>                                            | <b><i>PDCD6IP</i></b>  | <b>4,836</b>                      |
| Glycogen phosphorylase, muscle form                    | <i>PYGM</i>            | 4,300                             |
| Proteasome subunit beta type-1                         | <i>PSMB1</i>           | 4,098                             |
| Glycogen phosphorylase, liver form                     | <i>PYGL</i>            | 4,097                             |
| Proteasome subunit alpha type-7                        | <i>PSMA7</i>           | 3,984                             |
| Proteasome subunit beta type-7                         | <i>PSMB7</i>           | 3,752                             |
| Asporin                                                | <i>ASPN</i>            | 3,734                             |
| Proteasome subunit alpha type-6                        | <i>PSMA6</i>           | 3,695                             |
| Proteasome subunit beta type-5                         | <i>PSMB5</i>           | 3,652                             |
| Homogentisate 1,2-dioxygenase                          | <i>HGD</i>             | 3,611                             |
| Receptor-type tyrosine-protein phosphatase             | <i>PTPRM</i>           | 3,610                             |
| Vacuolar protein sorting-associated protein 28 homolog | <i>VPS28</i>           | 3,525                             |
| Proteasome subunit alpha type-2                        | <i>PSMA2</i>           | 3,511                             |
| Proteasome subunit alpha type-4                        | <i>PSMA4</i>           | 3,460                             |
| Proteasome subunit beta type-4                         | <i>PSMB4</i>           | 3,443                             |
| Cation-independent mannose-6-phosphate receptor        | <i>IGF2R</i>           | 3,377                             |
| Eukaryotic initiation factor 4A-II                     | <i>EIF4A2</i>          | 3,345                             |
| <b>Protein kinase C-binding protein NELL2</b>          | <b><i>NELL2</i></b>    | <b>3,340</b>                      |
| 3-mercaptopyruvate sulfurtransferase                   | <i>MPST</i>            | 3,327                             |
| Mannose-1-phosphate guanyltransferase beta             | <i>GMPPB</i>           | 3,264                             |
| Cytosolic 10-formyltetrahydrofolate dehydrogenase      | <i>ALDH1L1</i>         | 3,226                             |
| Cytoplasmic aconitate hydratase                        | <i>ACO1</i>            | 3,172                             |
| S-adenosylmethionine synthase isoform type-1           | <i>MAT1A</i>           | 3,097                             |
| Delta-aminolevulinic acid dehydratase                  | <i>ALAD</i>            | 3,039                             |
| Tubulin alpha-4A chain                                 | <i>TUBA4A</i>          | 3,033                             |
| Vacuolar protein sorting-associated protein 37B        | <i>VPS37B</i>          | 3,012                             |
| <b>Adenosylhomocysteinase</b>                          | <b><i>AHCY</i></b>     | <b>2,989</b>                      |
| Regucalcin                                             | <i>RGN</i>             | 2,989                             |
| Fructose-bisphosphate aldolase B                       | <i>ALDOB</i>           | 2,989                             |
| 4-trimethylaminobutyraldehyde dehydrogenase            | <i>ALDH9A1</i>         | 2,960                             |
| Microtubule-associated protein RP/EB family member 2   | <i>MAPRE2</i>          | 2,933                             |
| Uroporphyrinogen decarboxylase                         | <i>UROD</i>            | 2,927                             |
| Coronin-1A                                             | <i>CORO1A</i>          | 2,918                             |
| Serine protease 23                                     | <i>PRSS23</i>          | 2,896                             |
| Proteasome subunit beta type-2                         | <i>PSMB2</i>           | 2,860                             |
| Haptoglobin                                            | <i>HP</i>              | 2,859                             |
| Collagen alpha-3(VI) chain                             | <i>COL6A3</i>          | 2,814                             |
| Argininosuccinate synthase                             | <i>ASS1</i>            | 2,791                             |
| <b>Galectin-3-binding protein</b>                      | <b><i>LGALS3BP</i></b> | <b>2,774</b>                      |
| <b>von Willebrand factor;von Willebrand antigen 2</b>  | <b><i>VWF</i></b>      | <b>2,736</b>                      |
| Lipoprotein lipase                                     | <i>LPL</i>             | 2,730                             |
| Protein MON2 homolog                                   | <i>MON2</i>            | 2,712                             |
| Coagulation factor X                                   | <i>F10</i>             | 2,700                             |

|                                                                  |                     |              |
|------------------------------------------------------------------|---------------------|--------------|
| 3-oxo-5-beta-steroid 4-dehydrogenase                             | <i>AKR1D1</i>       | 2,696        |
| Proteasome subunit alpha type-5                                  | <i>PSMA5</i>        | 2,660        |
| Reelin                                                           | <i>RELN</i>         | 2,654        |
| Proteasome subunit alpha type-3                                  | <i>PSMA3</i>        | 2,636        |
| Prostaglandin reductase 1                                        | <i>PTGR1</i>        | 2,592        |
| Complement C4-A                                                  | <i>C4A;C4B</i>      | 2,588        |
| Prostamide/prostaglandin F synthase                              | <i>FAM213B</i>      | 2,553        |
| Collectin-10                                                     | <i>COLEC10</i>      | 2,547        |
| 26S proteasome non-ATPase regulatory subunit 5                   | <i>PSMD5</i>        | 2,523        |
| Carbonic anhydrase 2                                             | <i>CA2</i>          | 2,519        |
| Ferritin heavy chain                                             | <i>FTH1</i>         | 2,515        |
| COP9 signalosome complex subunit 7b                              | <i>COPS7B</i>       | 2,509        |
| Clusterin                                                        | <i>CLU</i>          | 2,506        |
| COP9 signalosome complex subunit 3                               | <i>COPS3</i>        | 2,467        |
| <b>Syntenin-1</b>                                                | <b><i>SDCBP</i></b> | <b>2,464</b> |
| Immunoglobulin J chain                                           | <i>IGJ</i>          | 2,463        |
| Retinal dehydrogenase 1                                          | <i>ALDH1A1</i>      | 2,440        |
| Ectonucleotide pyrophosphatase/phosphodiesterase family member 2 | <i>ENPP2</i>        | 2,412        |
| Alpha-crystallin B chain                                         | <i>CRYAB</i>        | 2,407        |
| Integrin-linked protein kinase                                   | <i>ILK</i>          | 2,402        |
| Ubiquitin thioesterase OTUB1                                     | <i>OTUB1</i>        | 2,375        |
| Tenascin                                                         | <i>TNC</i>          | 2,365        |
| Neuroserpin                                                      | <i>SERPINI1</i>     | 2,360        |
| Quinone oxidoreductase                                           | <i>CRYZ</i>         | 2,330        |
| Pro-low-density lipoprotein receptor-related protein 1           | <i>LRP1</i>         | 2,328        |
| Proteasome subunit beta type-6                                   | <i>PSMB6</i>        | 2,324        |
| Membrane-bound transcription factor site-1 protease              | <i>MBTSP1</i>       | 2,321        |
| Proteasome subunit alpha type-1                                  | <i>PSMA1</i>        | 2,316        |
| General vesicular transport factor p115                          | <i>USO1</i>         | 2,311        |
| Alcohol dehydrogenase class-3                                    | <i>ADH5</i>         | 2,301        |
| COP9 signalosome complex subunit 4                               | <i>COPS4</i>        | 2,294        |
| Sulfotransferase 1C2                                             | <i>SULT1C2</i>      | 2,293        |
| Thyroglobulin                                                    | <i>TG</i>           | 2,282        |
| Ras-related protein Rab-5B                                       | <i>RAB5B</i>        | 2,269        |
| Collagen alpha-1(II) chain                                       | <i>COL2A1</i>       | 2,246        |
| Tetraspanin-14                                                   | <i>TSPAN14</i>      | 2,231        |
| Betaine--homocysteine S-methyltransferase 1                      | <i>BHMT</i>         | 2,218        |
| Collagen alpha-2(V) chain                                        | <i>COL5A2</i>       | 2,204        |
| Thrombospondin-4                                                 | <i>THBS4</i>        | 2,203        |
| Proteasome subunit beta type-3                                   | <i>PSMB3</i>        | 2,197        |
| Nicotinate-nucleotide pyrophosphorylase [carboxylating]          | <i>QPRT</i>         | 2,184        |
| Golgi membrane protein 1                                         | <i>GOLM1</i>        | 2,177        |
| Flavin reductase (NADPH)                                         | <i>BLVRB</i>        | 2,156        |
| 26S protease regulatory subunit 6A                               | <i>PSMC3</i>        | 2,154        |
| Phenazine biosynthesis-like domain-containing protein            | <i>PBLD</i>         | 2,146        |
| Glycogen phosphorylase, brain form                               | <i>PYGB</i>         | 2,135        |
| Galactokinase                                                    | <i>GALK1</i>        | 2,130        |
| Follistatin-related protein 1                                    | <i>FSTL1</i>        | 2,130        |

|                                                                         |                      |              |
|-------------------------------------------------------------------------|----------------------|--------------|
| Aflatoxin B1 aldehyde reductase member 4                                | <i>AKR7L</i>         | 2,122        |
| Actin-related protein 2/3 complex subunit 1B                            | <i>ARPC1B</i>        | 2,120        |
| Ribonucleoside-diphosphate reductase large subunit                      | <i>RRM1</i>          | 2,083        |
| Protocadherin Fat 1                                                     | <i>FAT1</i>          | 2,074        |
| Septin-9                                                                | <i>09-Sep</i>        | 2,074        |
| 4-hydroxyphenylpyruvate dioxygenase                                     | <i>HPD</i>           | 2,068        |
| Complement C1q tumor necrosis factor-related protein 3                  | <i>C1QTNF3</i>       | 2,056        |
| Vesicular integral-membrane protein VIP36                               | <i>LMAN2</i>         | 2,020        |
| Procollagen-lysine,2-oxoglutarate 5-dioxygenase 1                       | <i>PLOD1</i>         | 1,988        |
| Collagen alpha-1(I) chain                                               | <i>COL1A1</i>        | 1,949        |
| Fumarylacetoacetate hydrolase domain-containing protein 2A              | <i>FAHD2A;FAHD2B</i> | 1,929        |
| Ras-related protein Rab-1B                                              | <i>RAB1B</i>         | 1,910        |
| Dehydrogenase/reductase SDR family member 11                            | <i>DHRS11</i>        | 1,893        |
| Collagen alpha-2(I) chain                                               | <i>COL1A2</i>        | 1,880        |
| <b>GTP-binding nuclear protein Ran</b>                                  | <b><i>RAN</i></b>    | <b>1,877</b> |
| Collagen alpha-1(V) chain                                               | <i>COL5A1</i>        | 1,874        |
| Metalloproteinase inhibitor 2                                           | <i>TIMP2</i>         | 1,870        |
| Tetraspanin-6                                                           | <i>TSPAN6</i>        | 1,852        |
| Serine/threonine-protein phosphatase 2A catalytic subunit alpha isoform | <i>PPP2CA</i>        | 1,843        |
| Mitogen-activated protein kinase 1                                      | <i>MAPK1</i>         | 1,822        |
| Endothelial protein C receptor                                          | <i>PROCR</i>         | 1,815        |
| Isocitrate dehydrogenase [NADP] cytoplasmic                             | <i>IDH1</i>          | 1,811        |
| Membrane primary amine oxidase                                          | <i>AOC3</i>          | 1,810        |
| Low molecular weight phosphotyrosine protein phosphatase                | <i>ACP1</i>          | 1,803        |
| Bone morphogenetic protein 1                                            | <i>BMP1</i>          | 1,796        |
| 60S ribosomal protein L12                                               | <i>RPL12</i>         | 1,784        |
| Adenosine kinase                                                        | <i>ADK</i>           | 1,783        |
| Beta-parvin                                                             | <i>PARVB</i>         | 1,779        |
| Peroxidasin homolog                                                     | <i>PXDN</i>          | 1,775        |
| Arginase-1                                                              | <i>ARG1</i>          | 1,764        |
| Dihydropyrimidinase                                                     | <i>DPYS</i>          | 1,763        |
| Fibrinogen gamma chain                                                  | <i>FGG</i>           | 1,745        |
| Tetraspanin-9                                                           | <i>TSPAN9</i>        | 1,742        |
| Transforming growth factor beta-1                                       | <i>TGFB1</i>         | 1,740        |
| Fibrocystin-L                                                           | <i>PKHD1L1</i>       | 1,737        |
| Glutamyl-peptide cyclotransferase                                       | <i>QPCT</i>          | 1,720        |
| Fumarylacetoacetase                                                     | <i>FAH</i>           | 1,715        |
| Arrestin domain-containing protein 1                                    | <i>ARRDC1</i>        | 1,706        |
| Probable maltase-glucoamylase-like protein                              | <i>LOC93432</i>      | 1,703        |
| V-type proton ATPase catalytic subunit A                                | <i>ATP6V1A</i>       | 1,700        |
| Alpha-galactosidase A                                                   | <i>GLA</i>           | 1,698        |
| Probable imidazolonepropionase                                          | <i>AMDHD1</i>        | 1,690        |
| ProSAAS                                                                 | <i>PCSK1N</i>        | 1,685        |
| Cerebellin-4                                                            | <i>CBLN4</i>         | 1,685        |
| Receptor-type tyrosine-protein phosphatase kappa                        | <i>PTPRK</i>         | 1,671        |
| Collagen alpha-2(VI) chain                                              | <i>COL6A2</i>        | 1,671        |
| Lysosomal alpha-mannosidase                                             | <i>MAN2B1</i>        | 1,666        |
| Cathepsin L2                                                            | <i>CTSV</i>          | 1,659        |

|                                                                 |                 |              |
|-----------------------------------------------------------------|-----------------|--------------|
| Glucosamine 6-phosphate N-acetyltransferase                     | <i>GNPNAT1</i>  | 1,649        |
| Isopentenyl-diphosphate Delta-isomerase 1                       | <i>IDI1</i>     | 1,636        |
| Vesicle-associated membrane protein 2                           | <i>VAMP2</i>    | 1,635        |
| cGMP-specific 3,5-cyclic phosphodiesterase                      | <i>PDE5A</i>    | 1,630        |
| cAMP-dependent protein kinase type I-alpha regulatory subunit   | <i>PRKAR1A</i>  | 1,624        |
| Acetyl-CoA carboxylase 1                                        | <i>ACACA</i>    | 1,620        |
| Alpha-mannosidase 2                                             | <i>MAN2A1</i>   | 1,619        |
| Heat shock protein beta-1                                       | <i>HSPB1</i>    | 1,616        |
| Extracellular matrix protein FRAS1                              | <i>FRAS1</i>    | 1,607        |
| <b>CD63 antigen</b>                                             | <b>CD63</b>     | <b>1,589</b> |
| MMS19 nucleotide excision repair protein homolog                | <i>MMS19</i>    | 1,583        |
| Apolipoprotein C-III                                            | <i>APOC3</i>    | 1,580        |
| 40S ribosomal protein S20                                       | <i>RPS20</i>    | 1,578        |
| L-xylulose reductase                                            | <i>DCXR</i>     | 1,556        |
| Fermitin family homolog 3                                       | <i>FERMT3</i>   | 1,552        |
| Prolyl endopeptidase FAP                                        | <i>FAP</i>      | 1,545        |
| Estrogen sulfotransferase                                       | <i>SULT1E1</i>  | 1,544        |
| Sphingomyelin phosphodiesterase                                 | <i>SMPD1</i>    | 1,538        |
| Ras-related C3 botulinum toxin substrate 2                      | <i>RAC2</i>     | 1,536        |
| 40S ribosomal protein SA                                        | <i>RPSA</i>     | 1,529        |
| Sorbitol dehydrogenase                                          | <i>SORD</i>     | 1,516        |
| Vacuolar protein-sorting-associated protein 25                  | <i>VPS25</i>    | 1,496        |
| Protein CutA                                                    | <i>CUTA</i>     | 1,485        |
| 26S proteasome non-ATPase regulatory subunit 14                 | <i>PSMD14</i>   | 1,483        |
| C-type lectin domain family 11 member A                         | <i>CLEC11A</i>  | 1,483        |
| <b>Talin-1</b>                                                  | <b>TLN1</b>     | <b>1,479</b> |
| <b>Gelsolin</b>                                                 | <b>GSN</b>      | <b>1,477</b> |
| COP9 signalosome complex subunit 2                              | <i>COPS2</i>    | 1,474        |
| Putative RNA-binding protein Luc7-like 2                        | <i>LUC7L2</i>   | 1,472        |
| 40S ribosomal protein S17                                       | <i>RPS17</i>    | 1,470        |
| <b>CD81 antigen</b>                                             | <b>CD81</b>     | <b>1,454</b> |
| Transmembrane protein 132C                                      | <i>TMEM132C</i> | 1,444        |
| Nuclear transport factor 2                                      | <i>NUTF2</i>    | 1,441        |
| Inositol-3-phosphate synthase 1                                 | <i>ISYNA1</i>   | 1,428        |
| 26S proteasome non-ATPase regulatory subunit 7                  | <i>PSMD7</i>    | 1,421        |
| Cochlin                                                         | <i>COCH</i>     | 1,410        |
| ER lumen protein-retaining receptor 1                           | <i>KDELRL1</i>  | 1,410        |
| ATP-dependent 6-phosphofructokinase, platelet type              | <i>PFKP</i>     | 1,398        |
| Carboxymethylenebutenolidase homolog                            | <i>CMBL</i>     | 1,391        |
| 26S proteasome non-ATPase regulatory subunit 11                 | <i>PSMD11</i>   | 1,388        |
| Deleted in malignant brain tumors 1 protein                     | <i>DMBT1</i>    | 1,387        |
| Pleckstrin homology domain-containing family B member 2         | <i>PLEKHB2</i>  | 1,360        |
| Gamma-glutamyl hydrolase                                        | <i>GGH</i>      | 1,349        |
| <b>Complement C3</b>                                            | <b>C3</b>       | <b>1,344</b> |
| LIM and senescent cell antigen-like-containing domain protein 1 | <i>LIMS1</i>    | 1,338        |
| Complement C1r subcomponent                                     | <i>C1R</i>      | 1,324        |
| Desmocollin-3                                                   | <i>DSC3</i>     | 1,321        |
| COP9 signalosome complex subunit 6                              | <i>COPS6</i>    | 1,316        |

|                                                          |                     |              |
|----------------------------------------------------------|---------------------|--------------|
| 26S proteasome non-ATPase regulatory subunit 3           | <i>PSMD3</i>        | 1,312        |
| Bisphosphoglycerate mutase                               | <i>BPGM</i>         | 1,301        |
| Galectin-related protein                                 | <i>LGALS1</i>       | 1,282        |
| Cathepsin Z                                              | <i>CTSZ</i>         | 1,275        |
| Tetraspanin-7                                            | <i>TSPAN7</i>       | 1,272        |
| Multiple epidermal growth factor-like domains protein 10 | <i>MEGF10</i>       | 1,242        |
| EMILIN-3                                                 | <i>EMILIN3</i>      | 1,232        |
| Vigilin                                                  | <i>HDLBP</i>        | 1,225        |
| Serine/threonine-protein phosphatase CPPED1              | <i>CPPED1</i>       | 1,189        |
| Collagen alpha-1(XII) chain                              | <i>COL12A1</i>      | 1,181        |
| <b>Alpha-2-macroglobulin</b>                             | <b><i>A2M</i></b>   | <b>1,112</b> |
| <b>Ig gamma-4 chain C region</b>                         | <b><i>IGHG4</i></b> | <b>1,089</b> |
| Cornulin                                                 | <i>CRNN</i>         | 1,037        |
| Hemoglobin subunit beta                                  | <i>HBB</i>          | 1,016        |

**Supplementary Table 2.** List of significantly altered proteins identified in ectosomes. Common proteins (52) in the list of Top 100 proteins often identified in EVs are highlighted in bold (see Supplementary Table 3).

| <b>Protein names</b>                                        | <b>Gene names</b>    | <b>-log<sub>10</sub>(p-value)</b> |
|-------------------------------------------------------------|----------------------|-----------------------------------|
| Band 4.1-like protein 2                                     | <i>EPB41L2</i>       | 9,852                             |
| Band 4.1-like protein 3                                     | <i>EPB41L3</i>       | 8,468                             |
| <b>Plasma membrane calcium-transporting ATPase 1</b>        | <b><i>ATP2B1</i></b> | <b>7,567</b>                      |
| Phosphatidylinositol 4-kinase alpha                         | <i>PI4KA</i>         | 7,239                             |
| Tubulin-specific chaperone A                                | <i>TBCA</i>          | 6,731                             |
| <b>Profilin-1</b>                                           | <b><i>PFN1</i></b>   | <b>6,708</b>                      |
| MARCKS-related protein                                      | <i>MARCKSL1</i>      | 6,644                             |
| <b>4F2 cell-surface antigen heavy chain</b>                 | <b><i>SLC3A2</i></b> | <b>6,412</b>                      |
| Cytoplasmic FMR1-interacting protein 1                      | <i>CYFIP1</i>        | 6,209                             |
| Myelin protein zero-like protein 1                          | <i>MPZL1</i>         | 6,167                             |
| Na(+)/H(+) exchange regulatory cofactor NHE-RF1             | <i>SLC9A3R1</i>      | 6,151                             |
| Unconventional myosin-Ic                                    | <i>MYO1C</i>         | 5,986                             |
| Protein scribble homolog                                    | <i>SCRIB</i>         | 5,985                             |
| N(G),N(G)-dimethylarginine dimethylaminohydrolase 1         | <i>DDAH1</i>         | 5,900                             |
| 2,3-cyclic-nucleotide 3-phosphodiesterase                   | <i>CNP</i>           | 5,696                             |
| <b>Sodium/potassium-transporting ATPase subunit alpha-1</b> | <b><i>ATP1A1</i></b> | <b>5,640</b>                      |
| Lethal(2) giant larvae protein homolog 1                    | <i>LLGL1</i>         | 5,620                             |
| FERM, RhoGEF and pleckstrin domain-containing protein 1     | <i>FARP1</i>         | 5,604                             |
| Integrin alpha-5                                            | <i>ITGA5</i>         | 5,589                             |
| Catenin delta-1                                             | <i>CTNND1</i>        | 5,556                             |
| Charged multivesicular body protein 6                       | <i>CHMP6</i>         | 5,507                             |
| Basigin                                                     | <i>BSG</i>           | 5,349                             |
| PDZ domain-containing protein GIPC1                         | <i>GIPC1</i>         | 5,304                             |
| Plastin-3                                                   | <i>PLS3</i>          | 5,244                             |
| Peripheral plasma membrane protein CASK                     | <i>CASK</i>          | 5,235                             |
| Trifunctional purine biosynthetic protein adenosine-3       | <i>GART</i>          | 5,214                             |
| <b>14-3-3 protein epsilon</b>                               | <b><i>YWHAE</i></b>  | <b>5,213</b>                      |
| <b>Moesin</b>                                               | <b><i>MSN</i></b>    | <b>5,169</b>                      |

|                                                                       |                     |              |
|-----------------------------------------------------------------------|---------------------|--------------|
| <b>Annexin A6</b>                                                     | <b>ANXA6</b>        | <b>5,150</b> |
| Myristoylated alanine-rich C-kinase substrate                         | MARCKS              | 5,105        |
| Protein lin-7 homolog C                                               | LIN7C               | 5,092        |
| Guanine nucleotide-binding protein subunit alpha-13                   | GNA13               | 5,054        |
| <b>Ubiquitin-40S ribosomal protein S27a</b>                           | <b>RPS27A;UBB/C</b> | <b>5,027</b> |
| Immunoglobulin superfamily member 3                                   | IGSF3               | 4,988        |
| EGF-like repeat and discoidin I-like domain-containing protein 3      | EDIL3               | 4,974        |
| Sodium/potassium-transporting ATPase subunit beta-1                   | ATP1B1              | 4,960        |
| Unconventional myosin-Ib                                              | MYO1B               | 4,885        |
| WD repeat-containing protein 6                                        | WDR6                | 4,826        |
| Guanine nucleotide-binding protein G(i) subunit alpha-1               | GNAI1               | 4,814        |
| Inactive tyrosine-protein kinase 7                                    | PTK7                | 4,790        |
| CD276 antigen                                                         | CD276               | 4,781        |
| Sodium/potassium-transporting ATPase subunit beta-3                   | ATP1B3              | 4,738        |
| Catenin beta-1                                                        | CTNNB1              | 4,699        |
| Unconventional myosin-I d                                             | MYO1D               | 4,582        |
| Calcyclin-binding protein                                             | CACYBP              | 4,579        |
| Heat shock 70 kDa protein 4                                           | HSPA4               | 4,550        |
| Guanine nucleotide-binding protein G(l)/G(s)/G(o) subunit gamma-12    | GNG12               | 4,474        |
| Afadin                                                                | MLLT4               | 4,449        |
| Catenin alpha-1                                                       | CTNNA1              | 4,449        |
| Ras-related protein Rab-21                                            | RAB21               | 4,444        |
| Kinesin-like protein KIF23                                            | KIF23               | 4,376        |
| A-kinase anchor protein 12                                            | AKAP12              | 4,302        |
| Complement component 1 Q subcomponent-binding protein                 | C1QBP               | 4,296        |
| <b>Peroxiredoxin-1</b>                                                | <b>PRDX1</b>        | <b>4,263</b> |
| Neutral amino acid transporter B(0)                                   | SLC1A5              | 4,221        |
| <b>Fatty acid synthase</b>                                            | <b>FASN</b>         | <b>4,138</b> |
| Pachytene checkpoint protein 2 homolog                                | TRIP13              | 4,113        |
| Radixin                                                               | RDX                 | 4,089        |
| Phospholipid-transporting ATPase IG                                   | ATP11C              | 4,077        |
| <b>Guanine nucleotide-binding protein G(s) subunit alpha isoforms</b> | <b>GNAS</b>         | <b>4,055</b> |
| Nck-associated protein 1                                              | NCKAP1              | 4,054        |
| C-1-tetrahydrofolate synthase                                         | MTHFD1              | 4,019        |
| Disks large homolog 1                                                 | DLG1                | 4,010        |
| Glutathione S-transferase P                                           | GSTP1               | 4,008        |
| Creatine kinase B-type                                                | CKB                 | 4,007        |
| Ectonucleotide pyrophosphatase/phosphodiesterase family member 1      | ENPP1               | 3,995        |
| Collagen alpha-1(XVIII) chain                                         | COL18A1             | 3,995        |
| Integrin alpha-1                                                      | ITGA1               | 3,987        |
| <b>14-3-3 protein beta/alpha</b>                                      | <b>YWHA B</b>       | <b>3,953</b> |
| Cyclin-dependent kinase 1                                             | CDK1                | 3,950        |
| Zinc transporter ZIP6                                                 | SLC39A6             | 3,947        |
| Microtubule-associated protein RP/EB family member 1                  | MAPRE1              | 3,914        |
| Large neutral amino acids transporter small subunit 1                 | SLC7A5              | 3,865        |
| Translation initiation factor eIF-2B subunit alpha                    | EIF2B1              | 3,790        |
| Monocarboxylate transporter 1                                         | SLC16A1             | 3,788        |
| <b>14-3-3 protein theta</b>                                           | <b>YWHA Q</b>       | <b>3,784</b> |

|                                                                      |                        |              |
|----------------------------------------------------------------------|------------------------|--------------|
| <b>Ras GTPase-activating-like protein</b>                            | <b><i>IQGAP1</i></b>   | <b>3,751</b> |
| <b>14-3-3 protein eta</b>                                            | <b><i>YWHAH</i></b>    | <b>3,743</b> |
| Peroxiredoxin-6                                                      | <i>PRDX6</i>           | 3,729        |
| Cytoplasmic FMR1-interacting protein 2                               | <i>CYFIP2</i>          | 3,687        |
| Kinesin-1 heavy chain                                                | <i>KIF5B</i>           | 3,680        |
| Nicastrin                                                            | <i>NCSTN</i>           | 3,677        |
| Guanine nucleotide-binding protein G(k) subunit alpha                | <i>GNAI3</i>           | 3,644        |
| <b>Annexin A2</b>                                                    | <b><i>ANXA2</i></b>    | <b>3,628</b> |
| dCTP pyrophosphatase 1                                               | <i>DCTPP1</i>          | 3,580        |
| <b>Integrin beta-1</b>                                               | <b><i>ITGB1</i></b>    | <b>3,579</b> |
| DnaJ homolog subfamily C member 5                                    | <i>DNAJC5</i>          | 3,575        |
| Four and a half LIM domains protein 1                                | <i>FHL1</i>            | 3,567        |
| Actin, cytoplasmic 2                                                 | <i>ACTG1</i>           | 3,555        |
| Endoplasmic                                                          | <i>HSP90B1</i>         | 3,554        |
| BolA-like protein 2                                                  | <i>BOLA2</i>           | 3,550        |
| Purine nucleoside phosphorylase                                      | <i>PNP</i>             | 3,538        |
| Basement membrane-specific heparan sulfate proteoglycan core protein | <i>HSPG2</i>           | 3,487        |
| Receptor-type tyrosine-protein phosphatase F                         | <i>PTPRF</i>           | 3,433        |
| D-3-phosphoglycerate dehydrogenase                                   | <i>PHGDH</i>           | 3,433        |
| Protein unc-45 homolog A                                             | <i>UNC45A</i>          | 3,432        |
| Insulin receptor substrate 4                                         | <i>IRS4</i>            | 3,430        |
| <b>Guanine nucleotide-binding protein G(i) subunit alpha-2</b>       | <b><i>GNAI2</i></b>    | <b>3,417</b> |
| Brain acid soluble protein 1                                         | <i>BASP1</i>           | 3,383        |
| <b>Ezrin</b>                                                         | <b><i>EZR</i></b>      | <b>3,375</b> |
| Cofilin-2                                                            | <i>CFL2</i>            | 3,371        |
| 10 kDa heat shock protein, mitochondrial                             | <i>HSPE1</i>           | 3,363        |
| Protein NDRG1                                                        | <i>NDRG1</i>           | 3,352        |
| Coxsackievirus and adenovirus receptor                               | <i>CXADR</i>           | 3,347        |
| Poly(rC)-binding protein 2                                           | <i>PCBP2</i>           | 3,321        |
| <b>Ubiquitin carboxyl-terminal hydrolase isozyme L1</b>              | <b><i>UCHL1</i></b>    | <b>3,321</b> |
| Guanine nucleotide-binding protein subunit alpha-11                  | <i>GNA11</i>           | 3,303        |
| <b>Heat shock protein HSP 90-beta</b>                                | <b><i>HSP90AB1</i></b> | <b>3,294</b> |
| Heat shock protein 105 kDa                                           | <i>HSPH1</i>           | 3,259        |
| <b>Ras-related protein Rab-10</b>                                    | <b><i>RAB10</i></b>    | <b>3,255</b> |
| GTP-binding protein Rheb                                             | <i>RHEB</i>            | 3,252        |
| Protein XRP2                                                         | <i>RP2</i>             | 3,245        |
| Equilibrative nucleoside transporter 1                               | <i>SLC29A1</i>         | 3,219        |
| Protein unc-13 homolog D                                             | <i>UNC13D</i>          | 3,212        |
| <b>14-3-3 protein zeta/delta</b>                                     | <b><i>YWHAZ</i></b>    | <b>3,209</b> |
| Poly(rC)-binding protein 1                                           | <i>PCBP1</i>           | 3,208        |
| Ephrin type-A receptor 2                                             | <i>EPHA2</i>           | 3,206        |
| Plexin-A1                                                            | <i>PLXNA1</i>          | 3,205        |
| Heat shock 70 kDa protein 1B;Heat shock 70 kDa protein 1A            | <i>HSPA1B;HSPA1A</i>   | 3,197        |
| Hypoxanthine-guanine phosphoribosyltransferase                       | <i>HPRT1</i>           | 3,188        |
| Programmed cell death protein 5                                      | <i>PDCD5</i>           | 3,183        |
| <b>T-complex protein 1 subunit alpha</b>                             | <b><i>TCP1</i></b>     | <b>3,167</b> |
| <b>Annexin A1</b>                                                    | <b><i>ANXA1</i></b>    | <b>3,162</b> |
| Prohibitin                                                           | <i>PHB</i>             | 3,152        |

|                                                                              |                                |              |
|------------------------------------------------------------------------------|--------------------------------|--------------|
| Chloride intracellular channel protein 4                                     | <i>CLIC4</i>                   | 3,144        |
| Leucine-rich repeat-containing protein 57                                    | <i>LRRC57</i>                  | 3,142        |
| Neurogenic locus notch homolog protein 2                                     | <i>NOTCH2</i>                  | 3,139        |
| <b>Ras-related protein Rab-7a</b>                                            | <b><i>RAB7A</i></b>            | <b>3,137</b> |
| Junctional adhesion molecule C                                               | <i>JAM3</i>                    | 3,108        |
| Nidogen-2                                                                    | <i>NID2</i>                    | 3,103        |
| Small VCP/p97-interacting protein                                            | <i>SVIP</i>                    | 3,093        |
| MOB kinase activator 1A;MOB kinase activator 1B                              | <i>MOB1A;MOB1B</i>             | 3,090        |
| Inorganic pyrophosphatase                                                    | <i>PPA1</i>                    | 3,088        |
| Ras-related protein Rab-23                                                   | <i>RAB23</i>                   | 3,071        |
| Zinc finger CCCH-type antiviral protein 1                                    | <i>ZC3HAV1</i>                 | 3,039        |
| HLA class I histocompatibility antigen, A-2 alpha chain                      | <i>HLA-A</i>                   | 3,034        |
| Glypican-4;Secreted glypican-4                                               | <i>GPC4</i>                    | 3,033        |
| Phosphoribosylformylglycinamide synthase                                     | <i>PFAS</i>                    | 2,977        |
| <b>L-lactate dehydrogenase A chain</b>                                       | <b><i>LDHA</i></b>             | <b>2,965</b> |
| T-complex protein 1 subunit epsilon                                          | <i>CCT5</i>                    | 2,944        |
| Single-stranded DNA-binding protein, mitochondrial                           | <i>SSBP1</i>                   | 2,938        |
| HLA class I histocompatibility antigen, B-7 alpha chain                      | <i>HLA-B</i>                   | 2,909        |
| Syntaxin-4                                                                   | <i>STX4</i>                    | 2,907        |
| Integrin alpha-V                                                             | <i>ITGAV</i>                   | 2,885        |
| Synaptosomal-associated protein 23                                           | <i>SNAP23</i>                  | 2,884        |
| Fascin                                                                       | <i>FSCN1</i>                   | 2,883        |
| <b>Peroxiredoxin-2</b>                                                       | <b><i>PRDX2</i></b>            | <b>2,876</b> |
| <b>14-3-3 protein gamma</b>                                                  | <b><i>YWHAQ</i></b>            | <b>2,874</b> |
| <b>Guanine nucleotide-binding protein G(I)/G(S)/G(T) subunit beta-1</b>      | <b><i>GNB1</i></b>             | <b>2,860</b> |
| Rho GDP-dissociation inhibitor 1                                             | <i>ARHGDI1</i>                 | 2,851        |
| Copine-3                                                                     | <i>CPNE3</i>                   | 2,845        |
| <b>Triosephosphate isomerase</b>                                             | <b><i>TPI1</i></b>             | <b>2,842</b> |
| ADP-sugar pyrophosphatase                                                    | <i>NUDT5</i>                   | 2,839        |
| Solute carrier family 12 member 2                                            | <i>SLC12A2</i>                 | 2,802        |
| <b>Elongation factor 1-alpha 1;Putative elongation factor 1-alpha-like 3</b> | <b><i>EEF1A1;EEF1A1 P5</i></b> | <b>2,761</b> |
| Synaptic vesicle membrane protein VAT-1 homolog                              | <i>VAT1</i>                    | 2,731        |
| T-complex protein 1 subunit eta                                              | <i>CCT7</i>                    | 2,729        |
| <b>T-complex protein 1 subunit zeta</b>                                      | <b><i>CCT6A</i></b>            | <b>2,728</b> |
| Serine/threonine-protein kinase MRCK beta                                    | <i>CDC42BPB</i>                | 2,699        |
| Multifunctional protein ADE2                                                 | <i>PAICS</i>                   | 2,688        |
| Protein FAM49B                                                               | <i>FAM49B</i>                  | 2,686        |
| <b>Ras-related protein Rab-5C</b>                                            | <b><i>RAB5C</i></b>            | <b>2,680</b> |
| Receptor-type tyrosine-protein phosphatase gamma                             | <i>PTPRG</i>                   | 2,677        |
| Myosin light polypeptide 6                                                   | <i>MYL6</i>                    | 2,673        |
| Destrin                                                                      | <i>DSTN</i>                    | 2,673        |
| <b>Fibronectin</b>                                                           | <b><i>FN1</i></b>              | <b>2,672</b> |
| Gap junction alpha-1 protein                                                 | <i>GJA1</i>                    | 2,665        |
| LIM and SH3 domain protein 1                                                 | <i>LASP1</i>                   | 2,647        |
| Aspartate aminotransferase, cytoplasmic                                      | <i>GOT1</i>                    | 2,643        |
| CTP synthase 1                                                               | <i>CTPS1</i>                   | 2,640        |
| <b>Guanine nucleotide-binding protein G(I)/G(S)/G(T) subunit beta-2</b>      | <b><i>GNB2</i></b>             | <b>2,631</b> |



|                                                         |                        |              |
|---------------------------------------------------------|------------------------|--------------|
| Collagen alpha-1(IV) chain                              | <i>COL4A1</i>          | 2,630        |
| Ras-related protein Rab-8B                              | <i>RAB8B</i>           | 2,629        |
| Elongation factor 1-delta                               | <i>EEF1D</i>           | 2,609        |
| <b>T-complex protein 1 subunit delta</b>                | <b><i>CCT4</i></b>     | <b>2,597</b> |
| Serine/threonine-protein kinase 26                      | <i>STK26</i>           | 2,584        |
| 60 kDa heat shock protein, mitochondrial                | <i>HSPD1</i>           | 2,582        |
| Integrin alpha-2                                        | <i>ITGA2</i>           | 2,567        |
| Disks large homolog 3                                   | <i>DLG3</i>            | 2,562        |
| Calcineurin B homologous protein 1                      | <i>CHP1</i>            | 2,549        |
| Ras-related protein Rab-35                              | <i>RAB35</i>           | 2,518        |
| Protein disulfide-isomerase A6                          | <i>PDIA6</i>           | 2,517        |
| <b>Ras-related protein Ral-A</b>                        | <b><i>RALA</i></b>     | <b>2,509</b> |
| Elongation factor 1-beta                                | <i>EEF1B2</i>          | 2,506        |
| Nuclear migration protein nudC                          | <i>NUDC</i>            | 2,505        |
| Mitogen-activated protein kinase kinase kinase kinase 4 | <i>MAP4K4</i>          | 2,487        |
| Choline transporter-like protein 2                      | <i>SLC44A2</i>         | 2,486        |
| Insulin-like growth factor 1 receptor                   | <i>IGF1R</i>           | 2,486        |
| <b>Glyceraldehyde-3-phosphate dehydrogenase</b>         | <b><i>GAPDH</i></b>    | <b>2,478</b> |
| <b>Ras-related protein R-Ras2</b>                       | <b><i>RRAS2</i></b>    | <b>2,478</b> |
| Protein deglycase DJ-1                                  | <i>PARK7</i>           | 2,444        |
| Coatomer subunit alpha;Xenin;Proxenin                   | <i>COPA</i>            | 2,433        |
| <b>Importin subunit beta-1</b>                          | <b><i>KPNB1</i></b>    | <b>2,432</b> |
| <b>T-complex protein 1 subunit beta</b>                 | <b><i>CCT2</i></b>     | <b>2,423</b> |
| Ras GTPase-activating protein 3                         | <i>RASA3</i>           | 2,405        |
| Importin-4                                              | <i>IPO4</i>            | 2,393        |
| Presenilin-1                                            | <i>PSEN1</i>           | 2,393        |
| 2-deoxynucleoside 5-phosphate N-hydrolase 1             | <i>DNPH1</i>           | 2,385        |
| Prohibitin-2                                            | <i>PHB2</i>            | 2,378        |
| <b>Heat shock protein HSP 90-alpha</b>                  | <b><i>HSP90AA1</i></b> | <b>2,376</b> |
| Elongation factor Tu, mitochondrial                     | <i>TUFM</i>            | 2,363        |
| Glycine-tRNA ligase                                     | <i>GARS</i>            | 2,356        |
| GTPase HRas                                             | <i>HRAS</i>            | 2,355        |
| <b>Pyruvate kinase PKM</b>                              | <b><i>PKM</i></b>      | <b>2,355</b> |
| Guanine nucleotide-binding protein G(o) subunit alpha   | <i>GNAO1</i>           | 2,351        |
| Rac GTPase-activating protein 1                         | <i>RACGAP1</i>         | 2,343        |
| ATP-dependent RNA helicase DDX3X/ DDX3Y                 | <i>DDX3X;DDX3Y</i>     | 2,341        |
| Zinc transporter ZIP14                                  | <i>SLC39A14</i>        | 2,336        |
| Sorting nexin-5                                         | <i>SNX5</i>            | 2,330        |
| Ubiquitin-conjugating enzyme E2 K                       | <i>UBE2K</i>           | 2,325        |
| Thioredoxin domain-containing protein 17                | <i>TXNDC17</i>         | 2,317        |
| <b>Cofilin-1</b>                                        | <b><i>CFL1</i></b>     | <b>2,313</b> |
| Heterogeneous nuclear ribonucleoprotein A3              | <i>HNRNPA3</i>         | 2,310        |
| DNA topoisomerase 2-alpha                               | <i>TOP2A</i>           | 2,308        |
| Calcium-binding protein 39                              | <i>CAB39</i>           | 2,290        |
| Collagen alpha-2(IV) chain;Canstatin                    | <i>COL4A2</i>          | 2,285        |
| Lactoylglutathione lyase                                | <i>GLO1</i>            | 2,281        |
| Rho-associated protein kinase 1                         | <i>ROCK1</i>           | 2,271        |
| Centrosomal protein of 55 kDa                           | <i>CEP55</i>           | 2,268        |

|                                                                                                     |                     |              |
|-----------------------------------------------------------------------------------------------------|---------------------|--------------|
| Nucleoside diphosphate kinase B;Putative nucleoside diphosphate kinase                              | <i>NME2;NME2P1</i>  | 2,255        |
| <b>Ras-related C3 botulinum toxin substrate 1</b>                                                   | <b><i>RAC1</i></b>  | <b>2,246</b> |
| Neuropilin-1                                                                                        | <i>NRP1</i>         | 2,227        |
| Phosphatidylethanolamine-binding protein 1; <b>Hippocampal cholinergic neurostimulating peptide</b> | <i>PEBP1</i>        | 2,217        |
| Integrin alpha-6                                                                                    | <i>ITGA6</i>        | 2,203        |
| Protein kinase C beta type                                                                          | <i>PRKCB</i>        | 2,196        |
| Fatty acid-binding protein, epidermal                                                               | <i>FABP5</i>        | 2,190        |
| <b>T-complex protein 1 subunit theta</b>                                                            | <b><i>CCT8</i></b>  | <b>2,180</b> |
| Endophilin-B1                                                                                       | <i>SH3GLB1</i>      | 2,168        |
| AP-2 complex subunit beta                                                                           | <i>AP2B1</i>        | 2,147        |
| Melanoma-associated antigen D2                                                                      | <i>MAGED2</i>       | 2,127        |
| Stathmin                                                                                            | <i>STMN1</i>        | 2,123        |
| Annexin A3                                                                                          | <i>ANXA3</i>        | 2,100        |
| Fructose-bisphosphate aldolase A                                                                    | <i>ALDOA</i>        | 2,100        |
| <b>Heat shock cognate 71 kDa protein</b>                                                            | <b><i>HSPA8</i></b> | <b>2,096</b> |
| <b>Alpha-enolase</b>                                                                                | <b><i>ENO1</i></b>  | <b>2,093</b> |
| Guanine nucleotide-binding protein G(q) subunit alpha                                               | <i>GNAQ</i>         | 2,090        |
| Phosphatidylinositol transfer protein beta isoform                                                  | <i>PITPNB</i>       | 2,089        |
| Junction plakoglobin                                                                                | <i>JUP</i>          | 2,075        |
| Filamin-B                                                                                           | <i>FLNB</i>         | 2,072        |
| Golgin subfamily A member 7                                                                         | <i>GOLGA7</i>       | 2,071        |
| Programmed cell death protein 10                                                                    | <i>PDCD10</i>       | 2,062        |
| Neuroblast differentiation-associated protein AHNAK                                                 | <i>AHNAK</i>        | 2,045        |
| Puromycin-sensitive aminopeptidase                                                                  | <i>NPEPPS</i>       | 2,044        |
| Lysyl oxidase homolog 2                                                                             | <i>LOXL2</i>        | 2,043        |
| Transgelin-2                                                                                        | <i>TAGLN2</i>       | 2,032        |
| Anosmin-1                                                                                           | <i>KAL1</i>         | 2,029        |
| Cyclin-Y                                                                                            | <i>CCNY</i>         | 2,016        |
| Laminin subunit alpha-5                                                                             | <i>LAMA5</i>        | 2,015        |
| Nucleoside diphosphate kinase A                                                                     | <i>NME1</i>         | 2,011        |
| Rho-related GTP-binding protein RhoG                                                                | <i>RHOG</i>         | 2,008        |
| Serine/threonine-protein kinase TAO1                                                                | <i>TAOK1</i>        | 1,998        |
| Proliferating cell nuclear antigen                                                                  | <i>PCNA</i>         | 1,991        |
| BTB/POZ domain-containing protein KCTD12                                                            | <i>KCTD12</i>       | 1,977        |
| Staphylococcal nuclease domain-containing protein 1                                                 | <i>SND1</i>         | 1,963        |
| CD59 glycoprotein                                                                                   | <i>CD59</i>         | 1,961        |
| Junctional adhesion molecule A                                                                      | <i>F11R</i>         | 1,959        |
| <b>Annexin A5</b>                                                                                   | <b><i>ANXA5</i></b> | <b>1,957</b> |
| Protein NDNF                                                                                        | <i>NDNF</i>         | 1,956        |
| NADH-cytochrome b5 reductase 3                                                                      | <i>CYB5R3</i>       | 1,953        |
| Ras-related protein Rab-13                                                                          | <i>RAB13</i>        | 1,943        |
| Occludin                                                                                            | <i>OCLN</i>         | 1,938        |
| Glypican-6;Secreted glypican-6                                                                      | <i>GPC6</i>         | 1,933        |
| CAD protein                                                                                         | <i>CAD</i>          | 1,909        |
| Lysosome-associated membrane glycoprotein 1                                                         | <i>LAMP1</i>        | 1,899        |
| <b>Protein-L-isoaspartate(D-aspartate) O-methyltransferase</b>                                      | <b><i>PCMT1</i></b> | <b>1,898</b> |
| Activator of 90 kDa heat shock protein ATPase homolog 1                                             | <i>AHSA1</i>        | 1,886        |

|                                                                    |                     |              |
|--------------------------------------------------------------------|---------------------|--------------|
| Fermitin family homolog 2                                          | <i>FERMT2</i>       | 1,875        |
| Band 4.1-like protein 5                                            | <i>EPB41L5</i>      | 1,870        |
| STE20-like serine/threonine-protein kinase                         | <i>SLK</i>          | 1,869        |
| Stress-70 protein, mitochondrial                                   | <i>HSPA9</i>        | 1,863        |
| DnaJ homolog subfamily B member 1                                  | <i>DNAJB1</i>       | 1,858        |
| Malate dehydrogenase, mitochondrial                                | <i>MDH2</i>         | 1,847        |
| Protein EFR3 homolog A                                             | <i>EFR3A</i>        | 1,842        |
| ATP synthase subunit alpha, mitochondrial                          | <i>ATP5A1</i>       | 1,827        |
| Agrin                                                              | <i>AGRN</i>         | 1,821        |
| Voltage-dependent anion-selective channel protein 2                | <i>VDAC2</i>        | 1,821        |
| Hsc70-interacting protein                                          | <i>ST13</i>         | 1,816        |
| F-actin-capping protein subunit beta                               | <i>CAPZB</i>        | 1,810        |
| POTE ankyrin domain family member E / F                            | <i>POTEE;POTEF</i>  | 1,798        |
| Gamma-aminobutyric acid receptor-associated protein-like 2         | <i>GABARAPL2</i>    | 1,775        |
| Teneurin-3                                                         | <i>TENM3</i>        | 1,767        |
| Histone H1.0                                                       | <i>H1FO</i>         | 1,727        |
| <b>Ubiquitin-like modifier-activating enzyme 1</b>                 | <b><i>UBA1</i></b>  | <b>1,726</b> |
| Eukaryotic translation initiation factor 2 subunit 1               | <i>EIF2S1</i>       | 1,722        |
| Desmoglein-2                                                       | <i>DSG2</i>         | 1,721        |
| <b>Elongation factor 2</b>                                         | <b><i>EEF2</i></b>  | <b>1,717</b> |
| GTPase NRas                                                        | <i>NRAS</i>         | 1,710        |
| ATP synthase subunit beta, mitochondrial                           | <i>ATP5B</i>        | 1,708        |
| Aspartate--tRNA ligase, cytoplasmic                                | <i>DARS</i>         | 1,700        |
| E3 ubiquitin-protein ligase CHIP                                   | <i>STUB1</i>        | 1,697        |
| Developmentally-regulated GTP-binding protein 1                    | <i>DRG1</i>         | 1,697        |
| <b>Protein-glutamine gamma-glutamyltransferase E</b>               | <b><i>TGM3</i></b>  | <b>1,692</b> |
| Tyrosine-protein kinase Lyn                                        | <i>LYN</i>          | 1,668        |
| <b>Clathrin heavy chain 1</b>                                      | <b><i>CLTC</i></b>  | <b>1,666</b> |
| Epidermal growth factor receptor                                   | <i>EGFR</i>         | 1,664        |
| Serine/threonine-protein phosphatase PP1-alpha catalytic subunit   | <i>PPP1CA</i>       | 1,663        |
| Thioredoxin-dependent peroxide reductase, mitochondrial            | <i>PRDX3</i>        | 1,658        |
| Malate dehydrogenase, cytoplasmic                                  | <i>MDH1</i>         | 1,655        |
| Syntaxin-7                                                         | <i>STX7</i>         | 1,638        |
| Inosine-5-monophosphate dehydrogenase 2                            | <i>IMPDH2</i>       | 1,635        |
| Ran-specific GTPase-activating protein                             | <i>RANBP1</i>       | 1,630        |
| <b>78 kDa glucose-regulated protein</b>                            | <b><i>HSPA5</i></b> | <b>1,628</b> |
| <b>Cell division control protein 42 homolog</b>                    | <b><i>CDC42</i></b> | <b>1,607</b> |
| DnaJ homolog subfamily A member 2                                  | <i>DNAJA2</i>       | 1,605        |
| <b>L-lactate dehydrogenase B chain</b>                             | <b><i>LDHB</i></b>  | <b>1,599</b> |
| ADP/ATP translocase 2                                              | <i>SLC25A5</i>      | 1,585        |
| Profilin-2                                                         | <i>PFN2</i>         | 1,580        |
| Phosphatidylinositol 5-phosphate 4-kinase type-2 alpha             | <i>PIP4K2A</i>      | 1,580        |
| Alanine--tRNA ligase, cytoplasmic                                  | <i>AARS</i>         | 1,560        |
| D-dopachrome decarboxylase;D-dopachrome decarboxylase-like protein | <i>DDT;DDTL</i>     | 1,555        |
| Protein 4.1                                                        | <i>EPB41</i>        | 1,553        |
| Histone H2B type 1-C/E/F/G/I                                       | <i>HIST1H2BC</i>    | 1,537        |
| Long-chain-fatty-acid--CoA ligase 4                                | <i>ACSL4</i>        | 1,535        |
| <b>Rab GDP dissociation inhibitor beta</b>                         | <b><i>GDI2</i></b>  | <b>1,524</b> |

|                                                                    |                                     |       |
|--------------------------------------------------------------------|-------------------------------------|-------|
| Phosphoribosyl pyrophosphate synthase-associated protein 2         | <i>PRPSAP2</i>                      | 1,523 |
| Ras-related protein Rap-2b                                         | <i>RAP2B</i>                        | 1,517 |
| Choline transporter-like protein 1                                 | <i>SLC44A1</i>                      | 1,516 |
| NudC domain-containing protein 2                                   | <i>NUDCD2</i>                       | 1,513 |
| Plasma membrane calcium-transporting ATPase 4                      | <i>ATP2B4</i>                       | 1,504 |
| Ras-related protein Rab-8A                                         | <i>RAB8A</i>                        | 1,503 |
| Axin interactor, dorsalization-associated protein                  | <i>AIDA</i>                         | 1,492 |
| High affinity cationic amino acid transporter 1                    | <i>SLC7A1</i>                       | 1,492 |
| N-alpha-acetyltransferase 15, NatA auxiliary subunit               | <i>NAA15</i>                        | 1,488 |
| Histone H1.4                                                       | <i>HIST1H1E</i>                     | 1,469 |
| Translational activator GCN1                                       | <i>GCN1L1</i>                       | 1,462 |
| Caspase-3;Caspase-3 subunit p17;Caspase-3 subunit p12              | <i>CASP3</i>                        | 1,458 |
| Proliferation-associated protein 2G4                               | <i>PA2G4</i>                        | 1,458 |
| Histone H2A type 1C;Histone H2A type 3;Histone H2A type 1-B/E      | <i>HIST1H2AC;HIST3H2A;HIST1H2AB</i> | 1,454 |
| Eukaryotic peptide chain release factor subunit 1                  | <i>ETF1</i>                         | 1,436 |
| Ephrin type-A receptor 7                                           | <i>EPHA7</i>                        | 1,434 |
| AP-2 complex subunit mu                                            | <i>AP2M1</i>                        | 1,407 |
| Raftlin                                                            | <i>RFTN1</i>                        | 1,400 |
| ADP-ribosylation factor 6                                          | <i>ARF6</i>                         | 1,400 |
| Macrophage migration inhibitory factor                             | <i>MIF</i>                          | 1,392 |
| Na(+)/H(+) exchange regulatory cofactor NHE-RF2                    | <i>SLC9A3R2</i>                     | 1,391 |
| Unconventional myosin-X                                            | <i>MYO10</i>                        | 1,386 |
| Aldose reductase                                                   | <i>AKR1B1</i>                       | 1,384 |
| Ubiquitin-conjugating enzyme E2 L3                                 | <i>UBE2L3</i>                       | 1,381 |
| Synaptobrevin homolog YKT6                                         | <i>YKT6</i>                         | 1,379 |
| Transaldolase                                                      | <i>TALDO1</i>                       | 1,377 |
| Ras-related protein Ral-B                                          | <i>RALB</i>                         | 1,377 |
| Barrier-to-autointegration factor                                  | <i>BANF1</i>                        | 1,373 |
| Nidogen-1                                                          | <i>NID1</i>                         | 1,361 |
| Protein kinase C and casein kinase substrate in neurons protein 3  | <i>PACSIN3</i>                      | 1,360 |
| V-type proton ATPase 116 kDa subunit a isoform 1                   | <i>ATP6V0A1</i>                     | 1,345 |
| Tubulin beta chain                                                 | <i>TUBB</i>                         | 1,343 |
| Protein S100-A10                                                   | <i>S100A10</i>                      | 1,340 |
| Ribose-phosphate pyrophosphokinase 1                               | <i>PRPS1</i>                        | 1,337 |
| Adenine phosphoribosyltransferase                                  | <i>APRT</i>                         | 1,333 |
| Guanine nucleotide-binding protein G(I)/G(S)/G(O) subunit gamma-10 | <i>GNG10</i>                        | 1,333 |
| von Willebrand factor A domain-containing protein 1                | <i>VWA1</i>                         | 1,328 |
| Arginine--tRNA ligase, cytoplasmic                                 | <i>RARS</i>                         | 1,308 |
| Pre-mRNA-processing-splicing factor 8                              | <i>PRPF8</i>                        | 1,298 |
| Polyadenylate-binding protein 1;Polyadenylate-binding protein 3    | <i>PABPC1;PABPC3</i>                | 1,286 |
| Prefoldin subunit 2                                                | <i>PFDN2</i>                        | 1,286 |
| Syntaxin-3                                                         | <i>STX3</i>                         | 1,282 |
| Vesicle-associated membrane protein 3                              | <i>VAMP3</i>                        | 1,276 |
| Astrocytic phosphoprotein PEA-15                                   | <i>PEA15</i>                        | 1,276 |
| Cysteine and histidine-rich domain-containing protein 1            | <i>CHORDC1</i>                      | 1,275 |
| Histone H2A type 2-C;Histone H2A type 2-A                          | <i>HIST2H2AC;HIST2H2AA3</i>         | 1,251 |

|                                            |               |       |
|--------------------------------------------|---------------|-------|
| Vimentin                                   | <i>VIM</i>    | 1,249 |
| ATP-binding cassette sub-family E member 1 | <i>ABCE1</i>  | 1,243 |
| Filamin-C                                  | <i>FLNC</i>   | 1,234 |
| Syndecan-2                                 | <i>SDC2</i>   | 1,224 |
| Disco-interacting protein 2 homolog B      | <i>DIP2B</i>  | 1,211 |
| Calnexin                                   | <i>CANX</i>   | 1,201 |
| Heterogeneous nuclear ribonucleoprotein U  | <i>HNRNPU</i> | 1,192 |
| Probable ATP-dependent RNA helicase DDX5   | <i>DDX5</i>   | 1,176 |
| DNA damage-binding protein 1               | <i>DDB1</i>   | 1,170 |
| 40S ribosomal protein S23                  | <i>RPS23</i>  | 1,166 |
| Protein disulfide-isomerase A4             | <i>PDIA4</i>  | 1,165 |
| Poly [ADP-ribose] polymerase 1             | <i>PARP1</i>  | 1,114 |

**Supplementary Table 3.** Table of the Top 100 proteins often identified in EVs (source: vesiclepedia, [http://microvesicles.org/extracellular vesicle markers](http://microvesicles.org/extracellular_vesicle_markers) ).

| <b>GENE</b>     | <b>NUMBER OF TIMES IDENTIFIED</b> |
|-----------------|-----------------------------------|
| <i>PDCD6IP</i>  | 399                               |
| <i>GAPDH</i>    | 377                               |
| <i>HSPA8</i>    | 363                               |
| <i>ACTB</i>     | 350                               |
| <i>ANXA2</i>    | 337                               |
| <i>CD9</i>      | 328                               |
| <i>PKM</i>      | 327                               |
| <i>HSP90AA1</i> | 327                               |
| <i>ENO1</i>     | 327                               |
| <i>ANXA5</i>    | 313                               |
| <i>HSP90AB1</i> | 306                               |
| <i>CD63</i>     | 306                               |
| <i>YWHAZ</i>    | 301                               |
| <i>YWHAE</i>    | 300                               |
| <i>EEF1A1</i>   | 295                               |
| <i>PGK1</i>     | 291                               |
| <i>CLTC</i>     | 283                               |
| <i>PPIA</i>     | 278                               |
| <i>SDCBP</i>    | 277                               |
| <i>ALDOA</i>    | 275                               |
| <i>EEF2</i>     | 274                               |
| <i>ALB</i>      | 274                               |
| <i>TPI1</i>     | 270                               |
| <i>VCP</i>      | 269                               |
| <i>CFL1</i>     | 268                               |
| <i>MSN</i>      | 266                               |
| <i>ATP1A1</i>   | 266                               |
| <i>PRDX1</i>    | 263                               |
| <i>MYH9</i>     | 262                               |
| <i>EZR</i>      | 262                               |
| <i>CD81</i>     | 262                               |
| <i>ANXA6</i>    | 260                               |
| <i>FLOT1</i>    | 259                               |

|                 |     |
|-----------------|-----|
| <b>YWHAB</b>    | 258 |
| <b>LDHB</b>     | 258 |
| <b>SLC3A2</b>   | 257 |
| <b>GNB1</b>     | 257 |
| <b>PFN1</b>     | 256 |
| <b>TSG101</b>   | 255 |
| <b>YWHAQ</b>    | 254 |
| <b>GNAI2</b>    | 252 |
| <b>CLIC1</b>    | 251 |
| <b>ANXA1</b>    | 251 |
| <b>ITGB1</b>    | 250 |
| <b>LDHA</b>     | 249 |
| <b>FASN</b>     | 248 |
| <b>CDC42</b>    | 248 |
| <b>RAP1B</b>    | 242 |
| <b>CCT2</b>     | 242 |
| <b>YWHAG</b>    | 240 |
| <b>GNB2</b>     | 240 |
| <b>ACTN4</b>    | 240 |
| <b>RAB5C</b>    | 239 |
| <b>C3</b>       | 239 |
| <b>RAB10</b>    | 236 |
| <b>HIST1H4A</b> | 234 |
| <b>KRT1</b>     | 233 |
| <b>FN1</b>      | 233 |
| <b>AHCY</b>     | 233 |
| <b>A2M</b>      | 232 |
| <b>BSG</b>      | 230 |
| <b>ACTN1</b>    | 229 |
| <b>ANXA7</b>    | 228 |
| <b>ACLY</b>     | 228 |
| <b>HIST1H4B</b> | 227 |
| <b>GDI2</b>     | 227 |
| <b>FLNA</b>     | 227 |
| <b>UBA1</b>     | 226 |
| <b>GNAS</b>     | 226 |
| <b>GSN</b>      | 225 |
| <b>CCT4</b>     | 225 |
| <b>RAN</b>      | 222 |
| <b>PRDX2</b>    | 222 |
| <b>RHOA</b>     | 220 |
| <b>CCT3</b>     | 220 |
| <b>RAC1</b>     | 219 |
| <b>LGALS3BP</b> | 219 |
| <b>TCP1</b>     | 218 |
| <b>KRT10</b>    | 218 |
| <b>CAP1</b>     | 218 |
| <b>RAB7A</b>    | 217 |
| <b>TUBB4B</b>   | 216 |
| <b>HSPA5</b>    | 215 |
| <b>IQGAP1</b>   | 214 |

|                 |     |
|-----------------|-----|
| <i>GPI</i>      | 214 |
| <i>RALA</i>     | 213 |
| <i>KPNB1</i>    | 212 |
| <i>HIST1H4I</i> | 212 |
| <i>TFRC</i>     | 211 |
| <i>EIF4A1</i>   | 211 |
| <i>HIST4H4</i>  | 210 |
| <i>CCT8</i>     | 210 |
| <i>TLN1</i>     | 209 |
| <i>HIST1H4K</i> | 209 |
| <i>HIST1H4H</i> | 209 |
| <i>CCT6A</i>    | 209 |
| <i>ANXA11</i>   | 209 |
| <i>HIST1H4J</i> | 208 |
| <i>HIST1H4F</i> | 208 |
| <i>HIST1H4D</i> | 208 |
